# Supplementary material for: Repressing PTBP1 fails to convert reactive astrocytes to dopaminergic neurons in a 6-hydroxydopamine mouse model of Parkinson’s disease
Source: eLife journal article supplement (doi:10.7554/elife.75636), 2022-05-09
Supplement: fig1-data1 [file original data and statistical analysis of Fig1B.xlsx]

## Sheet: Sheet1
	cell number in substantia nigra after AAV delivery			GFP+	GFP+PTB+	GFP+PTB+/GFP+（100%）
	AAV-shscramble	1 month	mouse1	132	123	93.1818
			mouse2	98	87	88.7755
			mouse3	102	88	86.2745
	AAV-shPTB	1 month	mouse1	79	11	13.9241
			mouse2	104	9	8.65385
			mouse3	82	12	14.6341
	AAV-shscramble	2 month	mouse1	83	72	86.747
			mouse2	120	104	86.6667
			mouse3	141	114	80.8511
	AAV-shPTB	2 month	mouse1	93	11	11.828
			mouse2	88	12	13.6364
			mouse3	124	8	6.45161
	AAV-shscramble	3 month	mouse1	134	129	96.2687
			mouse2	95	94	98.9474
			mouse3	101	89	88.1188
	AAV-shPTB	3 month	mouse1	109	6	5.50459
			mouse2	110	6	5.45455
			mouse3	115	11	9.56522
	AAV-shscramble			AAV-shPtbp1
1 M	93.1818	88.7755	86.2745	13.924	8.65385	14.6341
2 M	86.747	86.6667	80.8511	11.828	13.6364	6.45161
3 M	96.2687	98.9474	88.1188	5.50459	5.45455	9.56522
	Two-way ANOVA analysis
	Table Analyzed	Data 1
	Two-way ANOVA	Ordinary
	Alpha	0.05
	Source of Variation	% of total variation	P value	P value summary	Significant?
	Interaction	0.5242	0.0224	*	Yes
	Row Factor	0.1321	0.2996	ns	No
	Column Factor	98.75	<0.0001	****	Yes
	ANOVA table	SS	DF	MS	F (DFn, DFd)	P value
	Interaction	151.3	2	75.64	F (2, 12) = 5.297	P=0.0224
	Row Factor	38.12	2	19.06	F (2, 12) = 1.335	P=0.2996
	Column Factor	28495	1	28495	F (1, 12) = 1996	P<0.0001
	Residual	171.4	12	14.28
	Difference between column means
	Mean of AAV-shscramble	89.54
	Mean of AAV-shPtbp1	9.961
	Difference between means	79.58
	SE of difference	1.781
	95% CI of difference	75.69 to 83.46
	Data summary
	Number of columns (Column Factor)	2
	Number of rows (Row Factor)	3
	Number of values	18
	Tukey's multiple comparison test
	Compare cell means regardless of rows and columns
	Number of families	1
	Number of comparisons per family	15
	Alpha	0.05
	Tukey's multiple comparisons test	Mean Diff.	95.00% CI of diff.	Below threshold?	Summary	Adjusted P Value
	1 M:AAV-shscramble vs. 1 M:AAV-shPtbp1	77.01	66.64 to 87.37	Yes	****	<0.0001
	1 M:AAV-shscramble vs. 2 M:AAV-shscramble	4.656	-5.708 to 15.02	No	ns	0.6657
	1 M:AAV-shscramble vs. 2 M:AAV-shPtbp1	78.77	68.41 to 89.14	Yes	****	<0.0001
	1 M:AAV-shscramble vs. 3 M:AAV-shscramble	-5.034	-15.40 to 5.329	No	ns	0.5952
	1 M:AAV-shscramble vs. 3 M:AAV-shPtbp1	82.57	72.21 to 92.93	Yes	****	<0.0001
	1 M:AAV-shPtbp1 vs. 2 M:AAV-shscramble	-72.35	-82.71 to -61.99	Yes	****	<0.0001
	1 M:AAV-shPtbp1 vs. 2 M:AAV-shPtbp1	1.765	-8.598 to 12.13	No	ns	0.9911
	1 M:AAV-shPtbp1 vs. 3 M:AAV-shscramble	-82.04	-92.40 to -71.68	Yes	****	<0.0001
	1 M:AAV-shPtbp1 vs. 3 M:AAV-shPtbp1	5.563	-4.801 to 15.93	No	ns	0.4985
	2 M:AAV-shscramble vs. 2 M:AAV-shPtbp1	74.12	63.75 to 84.48	Yes	****	<0.0001
	2 M:AAV-shscramble vs. 3 M:AAV-shscramble	-9.69	-20.05 to 0.6735	No	ns	0.0719
	2 M:AAV-shscramble vs. 3 M:AAV-shPtbp1	77.91	67.55 to 88.28	Yes	****	<0.0001
	2 M:AAV-shPtbp1 vs. 3 M:AAV-shscramble	-83.81	-94.17 to -73.44	Yes	****	<0.0001
	2 M:AAV-shPtbp1 vs. 3 M:AAV-shPtbp1	3.797	-6.566 to 14.16	No	ns	0.8143
	3 M:AAV-shscramble vs. 3 M:AAV-shPtbp1	87.6	77.24 to 97.97	Yes	****	<0.0001
	Test details	Mean 1	Mean 2	Mean Diff.	SE of diff.	N1	N2	q	DF
	1 M:AAV-shscramble vs. 1 M:AAV-shPtbp1	89.41	12.4	77.01	3.085	3	3	35.3	12
	1 M:AAV-shscramble vs. 2 M:AAV-shscramble	89.41	84.75	4.656	3.085	3	3	2.134	12
	1 M:AAV-shscramble vs. 2 M:AAV-shPtbp1	89.41	10.64	78.77	3.085	3	3	36.11	12
	1 M:AAV-shscramble vs. 3 M:AAV-shscramble	89.41	94.44	-5.034	3.085	3	3	2.308	12
	1 M:AAV-shscramble vs. 3 M:AAV-shPtbp1	89.41	6.841	82.57	3.085	3	3	37.85	12
	1 M:AAV-shPtbp1 vs. 2 M:AAV-shscramble	12.4	84.75	-72.35	3.085	3	3	33.16	12
	1 M:AAV-shPtbp1 vs. 2 M:AAV-shPtbp1	12.4	10.64	1.765	3.085	3	3	0.8092	12
	1 M:AAV-shPtbp1 vs. 3 M:AAV-shscramble	12.4	94.44	-82.04	3.085	3	3	37.6	12
	1 M:AAV-shPtbp1 vs. 3 M:AAV-shPtbp1	12.4	6.841	5.563	3.085	3	3	2.55	12
	2 M:AAV-shscramble vs. 2 M:AAV-shPtbp1	84.75	10.64	74.12	3.085	3	3	33.97	12
	2 M:AAV-shscramble vs. 3 M:AAV-shscramble	84.75	94.44	-9.69	3.085	3	3	4.442	12
	2 M:AAV-shscramble vs. 3 M:AAV-shPtbp1	84.75	6.841	77.91	3.085	3	3	35.71	12
	2 M:AAV-shPtbp1 vs. 3 M:AAV-shscramble	10.64	94.44	-83.81	3.085	3	3	38.41	12
	2 M:AAV-shPtbp1 vs. 3 M:AAV-shPtbp1	10.64	6.841	3.797	3.085	3	3	1.74	12
	3 M:AAV-shscramble vs. 3 M:AAV-shPtbp1	94.44	6.841	87.6	3.085	3	3	40.15	12
