# Supplementary material for: Repressing PTBP1 fails to convert reactive astrocytes to dopaminergic neurons in a 6-hydroxydopamine mouse model of Parkinson’s disease
Source: eLife journal article supplement (doi:10.7554/elife.75636), 2022-05-09
Supplement: fig1-data2 [file original data and statistical analysis of Fig1D.xlsx]

## Sheet: Sheet1
	substantia nigra
			GFP+	NeuN+GFP+	TH+GFP+	(NeuN+GFP+)/GFP+(100%)	(TH+GFP+)/GFP+(100%)
	1 MONTH	AAV-shscramble mz-1	146	0	0	0	0
		AAV-shscramble mz-2	155	0	0	0	0
		AAV-shscramble mz-3	148	0	0	0	0
		AAV-shPTB mz-1	171	17	10	0.0994152	0.0584795
		AAV-shPTB mz-2	150	23	19	0.153333	0.126667
		AAV-shPTB mz-3	142	18	12	0.126761	0.084507
	2 MONTH	AAV-shscramble mz-1	149	8	6	0.0536913	0.0402685
		AAV-shscramble mz-2	151	1	0	0.00662252	0
		AAV-shscramble mz-3	150	0	0	0	0
		AAV-shPTB mz-1	140	59	47	0.421429	0.335714
		AAV-shPTB mz-2	187	73	61	0.390374	0.326203
		AAV-shPTB mz-3	152	64	38	0.421053	0.25
	3 MONTH	AAV-shscramble mz-1	159	0	0	0	0
		AAV-shscramble mz-2	168	2	0	0.0119048	0
		AAV-shscramble mz-3	133	10	11	0.075188	0.0827068
		AAV-shPTB mz-1	165	37	32	0.224242	0.193939
		AAV-shPTB mz-2	173	95	75	0.549133	0.433526
		AAV-shPTB mz-3	192	117	98	0.609375	0.510417
	(NeuN+GFP+)/GFP+(100%)												(TH+GFP+)/GFP+(100%)
	AAV-shscramble			AAV-shPTB									AAV-shscramble			AAV-shPTB
1 M	0	0	0	9.94	15.33	12.68						1 M	0	0	0	5.85	12.67	8.45
2 M	5.37	0.66	0	42.14	39.04	42.11						2 M	4.03	0	0	33.57	32.62	25
3 M	0	1.19	7.52	22.42	54.91	60.94						3 M	0	0	8.27	19.39	43.35	51.04
	Two-way ANOVA analysis												Two-way ANOVA analysis
	Table Analyzed	Grouped: Entering replicate data											Table Analyzed	Grouped: Entering replicate data
	Two-way ANOVA	Ordinary											Two-way ANOVA	Ordinary
	Alpha	0.05											Alpha	0.05
	Source of Variation	% of total variation	P value	P value summary	Significant?								Source of Variation	% of total variation	P value	P value summary	Significant?
	Interaction	11.14	0.0222	*	Yes								Interaction	11.94	0.0257	*	Yes
	Row Factor	15.43	0.0082	**	Yes								Row Factor	17	0.0089	**	Yes
	Column Factor	60.88	<0.0001	****	Yes								Column Factor	56.87	<0.0001	****	Yes
	ANOVA table	SS	DF	MS	F (DFn, DFd)	P value							ANOVA table	SS	DF	MS	F (DFn, DFd)	P value
	Interaction	824.1	2	412	F (2, 12) = 5.321	P=0.0222							Interaction	562.7	2	281.3	F (2, 12) = 5.045	P=0.0257
	Row Factor	1142	2	570.8	F (2, 12) = 7.370	P=0.0082							Row Factor	801	2	400.5	F (2, 12) = 7.181	P=0.0089
	Column Factor	4505	1	4505	F (1, 12) = 58.18	P<0.0001							Column Factor	2680	1	2680	F (1, 12) = 48.06	P<0.0001
	Residual	929.3	12	77.44									Residual	669.2	12	55.77
	Difference between column means												Difference between column means
	Mean of AAV-shscramble	1.638											Mean of AAV-shscramble	1.367
	Mean of AAV-shPTB	33.28											Mean of AAV-shPTB	25.77
	Difference between means	-31.64											Difference between means	-24.4
	SE of difference	4.148											SE of difference	3.52
	95% CI of difference	-40.68 to -22.60											95% CI of difference	-32.07 to -16.73
	Data summary												Data summary
	Number of columns (Column Factor)	2											Number of columns (Column Factor)	2
	Number of rows (Row Factor)	3											Number of rows (Row Factor)	3
	Number of values	18											Number of values	18
	Tukey's multiple comparison test												Tukey's multiple comparison test
	Compare cell means regardless of rows and columns												Compare cell means regardless of rows and columns
	Number of families	1											Number of families	1
	Number of comparisons per family	15											Number of comparisons per family	15
	Alpha	0.05											Alpha	0.05
	Tukey's multiple comparisons test	Mean Diff.	95.00% CI of diff.	Below threshold?	Summary	Adjusted P Value							Tukey's multiple comparisons test	Mean Diff.	95.00% CI of diff.	Below threshold?	Summary	Adjusted P Value
	1 M:AAV-shscramble vs. 1 M:AAV-shPTB	-12.65	-36.78 to 11.48	No	ns	0.522							1 M:AAV-shscramble vs. 1 M:AAV-shPTB	-8.99	-29.47 to 11.49	No	ns	0.6853
	1 M:AAV-shscramble vs. 2 M:AAV-shscramble	-2.01	-26.14 to 22.12	No	ns	0.9997							1 M:AAV-shscramble vs. 2 M:AAV-shscramble	-1.343	-21.82 to 19.14	No	ns	>0.9999
	1 M:AAV-shscramble vs. 2 M:AAV-shPTB	-41.1	-65.23 to -16.96	Yes	**	0.001							1 M:AAV-shscramble vs. 2 M:AAV-shPTB	-30.4	-50.88 to -9.916	Yes	**	0.0033
	1 M:AAV-shscramble vs. 3 M:AAV-shscramble	-2.903	-27.04 to 21.23	No	ns	0.9982							1 M:AAV-shscramble vs. 3 M:AAV-shscramble	-2.757	-23.24 to 17.72	No	ns	0.997
	1 M:AAV-shscramble vs. 3 M:AAV-shPTB	-46.09	-70.22 to -21.96	Yes	***	0.0004							1 M:AAV-shscramble vs. 3 M:AAV-shPTB	-37.93	-58.41 to -17.45	Yes	***	0.0005
	1 M:AAV-shPTB vs. 2 M:AAV-shscramble	10.64	-13.49 to 34.77	No	ns	0.6816							1 M:AAV-shPTB vs. 2 M:AAV-shscramble	7.647	-12.83 to 28.13	No	ns	0.803
	1 M:AAV-shPTB vs. 2 M:AAV-shPTB	-28.45	-52.58 to -4.312	Yes	*	0.0182							1 M:AAV-shPTB vs. 2 M:AAV-shPTB	-21.41	-41.89 to -0.9256	Yes	*	0.0387
	1 M:AAV-shPTB vs. 3 M:AAV-shscramble	9.747	-14.39 to 33.88	No	ns	0.7503							1 M:AAV-shPTB vs. 3 M:AAV-shscramble	6.233	-14.25 to 26.71	No	ns	0.9016
	1 M:AAV-shPTB vs. 3 M:AAV-shPTB	-33.44	-57.57 to -9.305	Yes	**	0.0057							1 M:AAV-shPTB vs. 3 M:AAV-shPTB	-28.94	-49.42 to -8.456	Yes	**	0.0049
	2 M:AAV-shscramble vs. 2 M:AAV-shPTB	-39.09	-63.22 to -14.95	Yes	**	0.0016							2 M:AAV-shscramble vs. 2 M:AAV-shPTB	-29.05	-49.53 to -8.572	Yes	**	0.0047
	2 M:AAV-shscramble vs. 3 M:AAV-shscramble	-0.8933	-25.03 to 23.24	No	ns	>0.9999							2 M:AAV-shscramble vs. 3 M:AAV-shscramble	-1.413	-21.89 to 19.07	No	ns	0.9999
	2 M:AAV-shscramble vs. 3 M:AAV-shPTB	-44.08	-68.21 to -19.95	Yes	***	0.0006							2 M:AAV-shscramble vs. 3 M:AAV-shPTB	-36.58	-57.06 to -16.10	Yes	***	0.0007
	2 M:AAV-shPTB vs. 3 M:AAV-shscramble	38.19	14.06 to 62.33	Yes	**	0.002							2 M:AAV-shPTB vs. 3 M:AAV-shscramble	27.64	7.159 to 48.12	Yes	**	0.0069
	2 M:AAV-shPTB vs. 3 M:AAV-shPTB	-4.993	-29.13 to 19.14	No	ns	0.9791							2 M:AAV-shPTB vs. 3 M:AAV-shPTB	-7.53	-28.01 to 12.95	No	ns	0.8123
	3 M:AAV-shscramble vs. 3 M:AAV-shPTB	-43.19	-67.32 to -19.05	Yes	***	0.0007							3 M:AAV-shscramble vs. 3 M:AAV-shPTB	-35.17	-55.65 to -14.69	Yes	***	0.001
	Test details	Mean 1	Mean 2	Mean Diff.	SE of diff.	N1	N2	q	DF				Test details	Mean 1	Mean 2	Mean Diff.	SE of diff.	N1	N2	q	DF
	1 M:AAV-shscramble vs. 1 M:AAV-shPTB	0	12.65	-12.65	7.185	3	3	2.49	12				1 M:AAV-shscramble vs. 1 M:AAV-shPTB	0	8.99	-8.99	6.098	3	3	2.085	12
	1 M:AAV-shscramble vs. 2 M:AAV-shscramble	0	2.01	-2.01	7.185	3	3	0.3956	12				1 M:AAV-shscramble vs. 2 M:AAV-shscramble	0	1.343	-1.343	6.098	3	3	0.3116	12
	1 M:AAV-shscramble vs. 2 M:AAV-shPTB	0	41.1	-41.1	7.185	3	3	8.089	12				1 M:AAV-shscramble vs. 2 M:AAV-shPTB	0	30.4	-30.4	6.098	3	3	7.05	12
	1 M:AAV-shscramble vs. 3 M:AAV-shscramble	0	2.903	-2.903	7.185	3	3	0.5714	12				1 M:AAV-shscramble vs. 3 M:AAV-shscramble	0	2.757	-2.757	6.098	3	3	0.6394	12
	1 M:AAV-shscramble vs. 3 M:AAV-shPTB	0	46.09	-46.09	7.185	3	3	9.072	12				1 M:AAV-shscramble vs. 3 M:AAV-shPTB	0	37.93	-37.93	6.098	3	3	8.796	12
	1 M:AAV-shPTB vs. 2 M:AAV-shscramble	12.65	2.01	10.64	7.185	3	3	2.094	12				1 M:AAV-shPTB vs. 2 M:AAV-shscramble	8.99	1.343	7.647	6.098	3	3	1.774	12
	1 M:AAV-shPTB vs. 2 M:AAV-shPTB	12.65	41.1	-28.45	7.185	3	3	5.599	12				1 M:AAV-shPTB vs. 2 M:AAV-shPTB	8.99	30.4	-21.41	6.098	3	3	4.965	12
	1 M:AAV-shPTB vs. 3 M:AAV-shscramble	12.65	2.903	9.747	7.185	3	3	1.918	12				1 M:AAV-shPTB vs. 3 M:AAV-shscramble	8.99	2.757	6.233	6.098	3	3	1.446	12
	1 M:AAV-shPTB vs. 3 M:AAV-shPTB	12.65	46.09	-33.44	7.185	3	3	6.582	12				1 M:AAV-shPTB vs. 3 M:AAV-shPTB	8.99	37.93	-28.94	6.098	3	3	6.711	12
	2 M:AAV-shscramble vs. 2 M:AAV-shPTB	2.01	41.1	-39.09	7.185	3	3	7.693	12				2 M:AAV-shscramble vs. 2 M:AAV-shPTB	1.343	30.4	-29.05	6.098	3	3	6.738	12
	2 M:AAV-shscramble vs. 3 M:AAV-shscramble	2.01	2.903	-0.8933	7.185	3	3	0.1758	12				2 M:AAV-shscramble vs. 3 M:AAV-shscramble	1.343	2.757	-1.413	6.098	3	3	0.3278	12
	2 M:AAV-shscramble vs. 3 M:AAV-shPTB	2.01	46.09	-44.08	7.185	3	3	8.676	12				2 M:AAV-shscramble vs. 3 M:AAV-shPTB	1.343	37.93	-36.58	6.098	3	3	8.485	12
	2 M:AAV-shPTB vs. 3 M:AAV-shscramble	41.1	2.903	38.19	7.185	3	3	7.517	12				2 M:AAV-shPTB vs. 3 M:AAV-shscramble	30.4	2.757	27.64	6.098	3	3	6.411	12
	2 M:AAV-shPTB vs. 3 M:AAV-shPTB	41.1	46.09	-4.993	7.185	3	3	0.9828	12				2 M:AAV-shPTB vs. 3 M:AAV-shPTB	30.4	37.93	-7.53	6.098	3	3	1.746	12
	3 M:AAV-shscramble vs. 3 M:AAV-shPTB	2.903	46.09	-43.19	7.185	3	3	8.5	12				3 M:AAV-shscramble vs. 3 M:AAV-shPTB	2.757	37.93	-35.17	6.098	3	3	8.157	12
