# Supplementary material for: Repressing PTBP1 fails to convert reactive astrocytes to dopaminergic neurons in a 6-hydroxydopamine mouse model of Parkinson’s disease
Source: eLife journal article supplement (doi:10.7554/elife.75636), 2022-05-09
Supplement: fig1-figsupp1-data1 [file description of source data for Fig1 supplement 1.docx]

Brain slices co-stained with GFP (green) and AldoC (purple), NeuN (red), NG2 (purple), or Iba-1 (red) 7 days after AAV-sh*Ptbp1* or AAV-shscramble delivery in the substantia nigra (SN) or striatum (STR).
