# Supplementary material for: Repressing PTBP1 fails to convert reactive astrocytes to dopaminergic neurons in a 6-hydroxydopamine mouse model of Parkinson’s disease
Source: eLife journal article supplement (doi:10.7554/elife.75636), 2022-05-09
Supplement: fig1-figsupp1-data1 [file original data and statistical analysis of Fig1 supplement 1.xlsx]

## Sheet: Sheet1
	20220223 AAV-hGfap-shPTB/shscramble 7d SN STR GFP/ALDOC/NeuN
			mice	GFP+	GFP+ALDOC+	(GFP+ALDOC+)/GFP+（%）	GFP+NeuN+	(GFP+NeuN+)/GFP+（%）
	SN	AAV-shPTB	#12	559	548	98.0322	3	0.536673
			#53	635	621	97.7953	2	0.314961
			#98	1016	997	98.1299	8	0.787402
		AAV-shScramble	#9	371	365	98.3827	0	0
			#10	238	237	99.5798	2	0.840336
			#13	315	313	99.3651	0	0
	STR	AAV-shPTB	#12	387	367	94.832	1	0.258398
			#53	466	448	96.1373	3	0.643777
			#98	331	315	95.1662	3	0.906344
		AAV-shScramble	#9	485	480	98.9691	1	0.206186
			#10	325	315	96.9231	2	0.615385
			#13	311	306	98.3923	3	0.96463
	20220223 AAV-hGfap-shPTB shscramble 7d SN STR GFP/NG2/Iba-1
			mice	GFP+	GFP+NG2+	(GFP+NG2+)/GFP+（%）	GFP+Iba-1+	(GFP+Iba-1+)/GFP+（%）
	SN	AAV-shPTB	#12	482	0	0	0	0
			#53	520	1	0.192308	0	0
			#98	663	1	0.15083	0	0
		AAV-shScramble	#9	322	0	0	0	0
			#10	191	0	0	0	0
			#13	183	1	0.546448	0	0
	STR	AAV-shPTB	#12	585	0	0	0	0
			#53	317	0	0	0	0
			#98	603	0	0	0	0
		AAV-shScramble	#9	588	1	0.170068	0	0
			#10	243	1	0.411523	0	0
			#13	344	0	0	0	0
	substantia nigra
	AAV-shscramble			AAV-shPtbp1							striatum
AldoC+	98.03	97.8	98.1299	98.38	99.58	99.3651					AAV-shscramble			AAV-shPtbp1
NeuN+	0.536673	0.314961	0.787402	0	0.840336	0				AldoC+	98.9691	96.9231	98.3923	94.832	96.1373	95.1662
NG2+	0	0.001923	0.001508	0	0	0.005464				NeuN+	0.206186	0.615385	0.96463	0.258398	0.643777	0.906344
Iba-1+	0	0	0	0	0	0				NG2+	0	0	0	0.170068	0.411523	0
										Iba-1+	0	0	0	0	0	0
	Two-way ANOVA analysis										Two-way ANOVA analysis
	Table Analyzed	Data 1
											Table Analyzed	Data 1
	Two-way ANOVA	Ordinary
	Alpha	0.05									Two-way ANOVA	Ordinary
											Alpha	0.05
	Source of Variation	% of total variation	P value	P value summary	Significant?
	Interaction	0.003944	0.0051	**	Yes						Source of Variation	% of total variation	P value	P value summary	Significant?
	Row Factor	99.99	<0.0001	****	Yes						Interaction	0.02088	0.0002	***	Yes
	Column Factor	0.0006307	0.1017	ns	No						Row Factor	99.96	<0.0001	****	Yes
											Column Factor	0.005658	0.0057	**	Yes
	ANOVA table	SS	DF	MS	F (DFn, DFd)	P value
	Interaction	1.719	3	0.5729	F (3, 16) = 6.285	P=0.0051					ANOVA table	SS	DF	MS	F (DFn, DFd)	P value
	Row Factor	43580	3	14527	F (3, 16) = 159346	P<0.0001					Interaction	8.752	3	2.917	F (3, 16) = 12.51	P=0.0002
	Column Factor	0.2749	1	0.2749	F (1, 16) = 3.015	P=0.1017					Row Factor	41910	3	13970	F (3, 16) = 59901	P<0.0001
	Residual	1.459	16	0.09117							Column Factor	2.372	1	2.372	F (1, 16) = 10.17	P=0.0057
											Residual	3.731	16	0.2332
	Difference between column means
	Mean of AAV-shscramble	24.63									Difference between column means
	Mean of AAV-shPtbp1	24.85									Mean of AAV-shscramble	24.67
	Difference between means	-0.214									Mean of AAV-shPtbp1	24.04
	SE of difference	0.1233									Difference between means	0.6287
	95% CI of difference	-0.4754 to 0.04727									SE of difference	0.1972
											95% CI of difference	0.2108 to 1.047
	Data summary
	Number of columns (Column Factor)	2									Data summary
	Number of rows (Row Factor)	4									Number of columns (Column Factor)	2
	Number of values	24									Number of rows (Row Factor)	4
	Tukey's multiple comparison test										Tukey's multiple comparison test
	Compare cell means regardless of rows and columns										Compare cell means regardless of rows and columns
	Number of families	1									Number of families	1
	Number of comparisons per family	28									Number of comparisons per family	28
	Alpha	0.05									Alpha	0.05
	Tukey's multiple comparisons test	Mean Diff.	95.00% CI of diff.	Below threshold?	Summary	Adjusted P Value					Tukey's multiple comparisons test	Mean Diff.	95.00% CI of diff.	Below threshold?	Summary	Adjusted P Value
	AldoC+:AAV-shscramble vs. AldoC+:AAV-shPtbp1	-1.122	-1.975 to -0.2682	Yes	**	0.0061					AldoC+:AAV-shscramble vs. AldoC+:AAV-shPtbp1	2.716	1.351 to 4.081	Yes	****	<0.0001
	AldoC+:AAV-shscramble vs. NeuN+:AAV-shscramble	97.44	96.59 to 98.29	Yes	****	<0.0001					AldoC+:AAV-shscramble vs. NeuN+:AAV-shscramble	97.5	96.13 to 98.86	Yes	****	<0.0001
	AldoC+:AAV-shscramble vs. NeuN+:AAV-shPtbp1	97.71	96.85 to 98.56	Yes	****	<0.0001					AldoC+:AAV-shscramble vs. NeuN+:AAV-shPtbp1	97.49	96.13 to 98.86	Yes	****	<0.0001
	AldoC+:AAV-shscramble vs. NG2+:AAV-shscramble	97.99	97.13 to 98.84	Yes	****	<0.0001					AldoC+:AAV-shscramble vs. NG2+:AAV-shscramble	98.09	96.73 to 99.46	Yes	****	<0.0001
	AldoC+:AAV-shscramble vs. NG2+:AAV-shPtbp1	97.98	97.13 to 98.84	Yes	****	<0.0001					AldoC+:AAV-shscramble vs. NG2+:AAV-shPtbp1	97.9	96.54 to 99.27	Yes	****	<0.0001
	AldoC+:AAV-shscramble vs. Iba-1+:AAV-shscramble	97.99	97.13 to 98.84	Yes	****	<0.0001					AldoC+:AAV-shscramble vs. Iba-1+:AAV-shscramble	98.09	96.73 to 99.46	Yes	****	<0.0001
	AldoC+:AAV-shscramble vs. Iba-1+:AAV-shPtbp1	97.99	97.13 to 98.84	Yes	****	<0.0001					AldoC+:AAV-shscramble vs. Iba-1+:AAV-shPtbp1	98.09	96.73 to 99.46	Yes	****	<0.0001
	AldoC+:AAV-shPtbp1 vs. NeuN+:AAV-shscramble	98.56	97.71 to 99.42	Yes	****	<0.0001					AldoC+:AAV-shPtbp1 vs. NeuN+:AAV-shscramble	94.78	93.42 to 96.15	Yes	****	<0.0001
	AldoC+:AAV-shPtbp1 vs. NeuN+:AAV-shPtbp1	98.83	97.97 to 99.68	Yes	****	<0.0001					AldoC+:AAV-shPtbp1 vs. NeuN+:AAV-shPtbp1	94.78	93.41 to 96.14	Yes	****	<0.0001
	AldoC+:AAV-shPtbp1 vs. NG2+:AAV-shscramble	99.11	98.25 to 99.96	Yes	****	<0.0001					AldoC+:AAV-shPtbp1 vs. NG2+:AAV-shscramble	95.38	94.01 to 96.74	Yes	****	<0.0001
	AldoC+:AAV-shPtbp1 vs. NG2+:AAV-shPtbp1	99.11	98.25 to 99.96	Yes	****	<0.0001					AldoC+:AAV-shPtbp1 vs. NG2+:AAV-shPtbp1	95.18	93.82 to 96.55	Yes	****	<0.0001
	AldoC+:AAV-shPtbp1 vs. Iba-1+:AAV-shscramble	99.11	98.25 to 99.96	Yes	****	<0.0001					AldoC+:AAV-shPtbp1 vs. Iba-1+:AAV-shscramble	95.38	94.01 to 96.74	Yes	****	<0.0001
	AldoC+:AAV-shPtbp1 vs. Iba-1+:AAV-shPtbp1	99.11	98.25 to 99.96	Yes	****	<0.0001					AldoC+:AAV-shPtbp1 vs. Iba-1+:AAV-shPtbp1	95.38	94.01 to 96.74	Yes	****	<0.0001
	NeuN+:AAV-shscramble vs. NeuN+:AAV-shPtbp1	0.2662	-0.5873 to 1.120	No	ns	0.9522					NeuN+:AAV-shscramble vs. NeuN+:AAV-shPtbp1	-0.00744	-1.373 to 1.358	No	ns	>0.9999
	NeuN+:AAV-shscramble vs. NG2+:AAV-shscramble	0.5452	-0.3083 to 1.399	No	ns	0.3943					NeuN+:AAV-shscramble vs. NG2+:AAV-shscramble	0.5954	-0.7698 to 1.961	No	ns	0.7919
	NeuN+:AAV-shscramble vs. NG2+:AAV-shPtbp1	0.5445	-0.3090 to 1.398	No	ns	0.3957					NeuN+:AAV-shscramble vs. NG2+:AAV-shPtbp1	0.4015	-0.9636 to 1.767	No	ns	0.9646
	NeuN+:AAV-shscramble vs. Iba-1+:AAV-shscramble	0.5463	-0.3072 to 1.400	No	ns	0.3919					NeuN+:AAV-shscramble vs. Iba-1+:AAV-shscramble	0.5954	-0.7698 to 1.961	No	ns	0.7919
	NeuN+:AAV-shscramble vs. Iba-1+:AAV-shPtbp1	0.5463	-0.3072 to 1.400	No	ns	0.3919					NeuN+:AAV-shscramble vs. Iba-1+:AAV-shPtbp1	0.5954	-0.7698 to 1.961	No	ns	0.7919
	NeuN+:AAV-shPtbp1 vs. NG2+:AAV-shscramble	0.279	-0.5746 to 1.132	No	ns	0.9399					NeuN+:AAV-shPtbp1 vs. NG2+:AAV-shscramble	0.6028	-0.7623 to 1.968	No	ns	0.7822
	NeuN+:AAV-shPtbp1 vs. NG2+:AAV-shPtbp1	0.2783	-0.5752 to 1.132	No	ns	0.9406					NeuN+:AAV-shPtbp1 vs. NG2+:AAV-shPtbp1	0.409	-0.9562 to 1.774	No	ns	0.9611
	NeuN+:AAV-shPtbp1 vs. Iba-1+:AAV-shscramble	0.2801	-0.5734 to 1.134	No	ns	0.9387					NeuN+:AAV-shPtbp1 vs. Iba-1+:AAV-shscramble	0.6028	-0.7623 to 1.968	No	ns	0.7822
	NeuN+:AAV-shPtbp1 vs. Iba-1+:AAV-shPtbp1	0.2801	-0.5734 to 1.134	No	ns	0.9387					NeuN+:AAV-shPtbp1 vs. Iba-1+:AAV-shPtbp1	0.6028	-0.7623 to 1.968	No	ns	0.7822
	NG2+:AAV-shscramble vs. NG2+:AAV-shPtbp1	-0.0006777	-0.8542 to 0.8528	No	ns	>0.9999					NG2+:AAV-shscramble vs. NG2+:AAV-shPtbp1	-0.1939	-1.559 to 1.171	No	ns	0.9995
	NG2+:AAV-shscramble vs. Iba-1+:AAV-shscramble	0.001144	-0.8524 to 0.8547	No	ns	>0.9999					NG2+:AAV-shscramble vs. Iba-1+:AAV-shscramble	0	-1.365 to 1.365	No	ns	>0.9999
	NG2+:AAV-shscramble vs. Iba-1+:AAV-shPtbp1	0.001144	-0.8524 to 0.8547	No	ns	>0.9999					NG2+:AAV-shscramble vs. Iba-1+:AAV-shPtbp1	0	-1.365 to 1.365	No	ns	>0.9999
	NG2+:AAV-shPtbp1 vs. Iba-1+:AAV-shscramble	0.001821	-0.8517 to 0.8553	No	ns	>0.9999					NG2+:AAV-shPtbp1 vs. Iba-1+:AAV-shscramble	0.1939	-1.171 to 1.559	No	ns	0.9995
	NG2+:AAV-shPtbp1 vs. Iba-1+:AAV-shPtbp1	0.001821	-0.8517 to 0.8553	No	ns	>0.9999					NG2+:AAV-shPtbp1 vs. Iba-1+:AAV-shPtbp1	0.1939	-1.171 to 1.559	No	ns	0.9995
	Iba-1+:AAV-shscramble vs. Iba-1+:AAV-shPtbp1	0	-0.8535 to 0.8535	No	ns	>0.9999					Iba-1+:AAV-shscramble vs. Iba-1+:AAV-shPtbp1	0	-1.365 to 1.365	No	ns	>0.9999
	Test details	Mean 1	Mean 2	Mean Diff.	SE of diff.	N1	N2	q			Test details	Mean 1	Mean 2	Mean Diff.	SE of diff.	N1	N2	q	DF
	AldoC+:AAV-shscramble vs. AldoC+:AAV-shPtbp1	97.99	99.11	-1.122	0.2465	3	3	6.435			AldoC+:AAV-shscramble vs. AldoC+:AAV-shPtbp1	98.09	95.38	2.716	0.3943	3	3	9.742	16
	AldoC+:AAV-shscramble vs. NeuN+:AAV-shscramble	97.99	0.5463	97.44	0.2465	3	3	559			AldoC+:AAV-shscramble vs. NeuN+:AAV-shscramble	98.09	0.5954	97.5	0.3943	3	3	349.7	16
	AldoC+:AAV-shscramble vs. NeuN+:AAV-shPtbp1	97.99	0.2801	97.71	0.2465	3	3	560.5			AldoC+:AAV-shscramble vs. NeuN+:AAV-shPtbp1	98.09	0.6028	97.49	0.3943	3	3	349.7	16
	AldoC+:AAV-shscramble vs. NG2+:AAV-shscramble	97.99	0.001144	97.99	0.2465	3	3	562.1			AldoC+:AAV-shscramble vs. NG2+:AAV-shscramble	98.09	0	98.09	0.3943	3	3	351.8	16
	AldoC+:AAV-shscramble vs. NG2+:AAV-shPtbp1	97.99	0.001821	97.98	0.2465	3	3	562.1			AldoC+:AAV-shscramble vs. NG2+:AAV-shPtbp1	98.09	0.1939	97.9	0.3943	3	3	351.1	16
	AldoC+:AAV-shscramble vs. Iba-1+:AAV-shscramble	97.99	0	97.99	0.2465	3	3	562.1			AldoC+:AAV-shscramble vs. Iba-1+:AAV-shscramble	98.09	0	98.09	0.3943	3	3	351.8	16
	AldoC+:AAV-shscramble vs. Iba-1+:AAV-shPtbp1	97.99	0	97.99	0.2465	3	3	562.1			AldoC+:AAV-shscramble vs. Iba-1+:AAV-shPtbp1	98.09	0	98.09	0.3943	3	3	351.8	16
	AldoC+:AAV-shPtbp1 vs. NeuN+:AAV-shscramble	99.11	0.5463	98.56	0.2465	3	3	565.4			AldoC+:AAV-shPtbp1 vs. NeuN+:AAV-shscramble	95.38	0.5954	94.78	0.3943	3	3	339.9	16
	AldoC+:AAV-shPtbp1 vs. NeuN+:AAV-shPtbp1	99.11	0.2801	98.83	0.2465	3	3	566.9			AldoC+:AAV-shPtbp1 vs. NeuN+:AAV-shPtbp1	95.38	0.6028	94.78	0.3943	3	3	339.9	16
	AldoC+:AAV-shPtbp1 vs. NG2+:AAV-shscramble	99.11	0.001144	99.11	0.2465	3	3	568.5			AldoC+:AAV-shPtbp1 vs. NG2+:AAV-shscramble	95.38	0	95.38	0.3943	3	3	342.1	16
	AldoC+:AAV-shPtbp1 vs. NG2+:AAV-shPtbp1	99.11	0.001821	99.11	0.2465	3	3	568.5			AldoC+:AAV-shPtbp1 vs. NG2+:AAV-shPtbp1	95.38	0.1939	95.18	0.3943	3	3	341.4	16
	AldoC+:AAV-shPtbp1 vs. Iba-1+:AAV-shscramble	99.11	0	99.11	0.2465	3	3	568.5			AldoC+:AAV-shPtbp1 vs. Iba-1+:AAV-shscramble	95.38	0	95.38	0.3943	3	3	342.1	16
	AldoC+:AAV-shPtbp1 vs. Iba-1+:AAV-shPtbp1	99.11	0	99.11	0.2465	3	3	568.5			AldoC+:AAV-shPtbp1 vs. Iba-1+:AAV-shPtbp1	95.38	0	95.38	0.3943	3	3	342.1	16
	NeuN+:AAV-shscramble vs. NeuN+:AAV-shPtbp1	0.5463	0.2801	0.2662	0.2465	3	3	1.527			NeuN+:AAV-shscramble vs. NeuN+:AAV-shPtbp1	0.5954	0.6028	-0.00744	0.3943	3	3	0.02668	16
	NeuN+:AAV-shscramble vs. NG2+:AAV-shscramble	0.5463	0.001144	0.5452	0.2465	3	3	3.128			NeuN+:AAV-shscramble vs. NG2+:AAV-shscramble	0.5954	0	0.5954	0.3943	3	3	2.135	16
	NeuN+:AAV-shscramble vs. NG2+:AAV-shPtbp1	0.5463	0.001821	0.5445	0.2465	3	3	3.124			NeuN+:AAV-shscramble vs. NG2+:AAV-shPtbp1	0.5954	0.1939	0.4015	0.3943	3	3	1.44	16
	NeuN+:AAV-shscramble vs. Iba-1+:AAV-shscramble	0.5463	0	0.5463	0.2465	3	3	3.134			NeuN+:AAV-shscramble vs. Iba-1+:AAV-shscramble	0.5954	0	0.5954	0.3943	3	3	2.135	16
	NeuN+:AAV-shscramble vs. Iba-1+:AAV-shPtbp1	0.5463	0	0.5463	0.2465	3	3	3.134			NeuN+:AAV-shscramble vs. Iba-1+:AAV-shPtbp1	0.5954	0	0.5954	0.3943	3	3	2.135	16
	NeuN+:AAV-shPtbp1 vs. NG2+:AAV-shscramble	0.2801	0.001144	0.279	0.2465	3	3	1.6			NeuN+:AAV-shPtbp1 vs. NG2+:AAV-shscramble	0.6028	0	0.6028	0.3943	3	3	2.162	16
	NeuN+:AAV-shPtbp1 vs. NG2+:AAV-shPtbp1	0.2801	0.001821	0.2783	0.2465	3	3	1.596			NeuN+:AAV-shPtbp1 vs. NG2+:AAV-shPtbp1	0.6028	0.1939	0.409	0.3943	3	3	1.467	16
	NeuN+:AAV-shPtbp1 vs. Iba-1+:AAV-shscramble	0.2801	0	0.2801	0.2465	3	3	1.607			NeuN+:AAV-shPtbp1 vs. Iba-1+:AAV-shscramble	0.6028	0	0.6028	0.3943	3	3	2.162	16
	NeuN+:AAV-shPtbp1 vs. Iba-1+:AAV-shPtbp1	0.2801	0	0.2801	0.2465	3	3	1.607			NeuN+:AAV-shPtbp1 vs. Iba-1+:AAV-shPtbp1	0.6028	0	0.6028	0.3943	3	3	2.162	16
	NG2+:AAV-shscramble vs. NG2+:AAV-shPtbp1	0.001144	0.001821	-0.0006777	0.2465	3	3	0.003887			NG2+:AAV-shscramble vs. NG2+:AAV-shPtbp1	0	0.1939	-0.1939	0.3943	3	3	0.6953	16
	NG2+:AAV-shscramble vs. Iba-1+:AAV-shscramble	0.001144	0	0.001144	0.2465	3	3	0.006561			NG2+:AAV-shscramble vs. Iba-1+:AAV-shscramble	0	0	0	0.3943	3	3	0	16
	NG2+:AAV-shscramble vs. Iba-1+:AAV-shPtbp1	0.001144	0	0.001144	0.2465	3	3	0.006561			NG2+:AAV-shscramble vs. Iba-1+:AAV-shPtbp1	0	0	0	0.3943	3	3	0	16
	NG2+:AAV-shPtbp1 vs. Iba-1+:AAV-shscramble	0.001821	0	0.001821	0.2465	3	3	0.01045			NG2+:AAV-shPtbp1 vs. Iba-1+:AAV-shscramble	0.1939	0	0.1939	0.3943	3	3	0.6953	16
	NG2+:AAV-shPtbp1 vs. Iba-1+:AAV-shPtbp1	0.001821	0	0.001821	0.2465	3	3	0.01045			NG2+:AAV-shPtbp1 vs. Iba-1+:AAV-shPtbp1	0.1939	0	0.1939	0.3943	3	3	0.6953	16
	Iba-1+:AAV-shscramble vs. Iba-1+:AAV-shPtbp1	0	0	0	0.2465	3	3	0			Iba-1+:AAV-shscramble vs. Iba-1+:AAV-shPtbp1	0	0	0	0.3943	3	3	0	16
