# Supplementary material for: Repressing PTBP1 fails to convert reactive astrocytes to dopaminergic neurons in a 6-hydroxydopamine mouse model of Parkinson’s disease
Source: eLife journal article supplement (doi:10.7554/elife.75636), 2022-05-09
Supplement: fig2-data2 [file description of source data for Fig2D.docx]

Brain slices co-stained GFP (green), HA (red) with TH (purple) in the substantia nigra 3 months after AAV-sh*Ptbp1* delivery.
