# Supplementary material for: Repressing PTBP1 fails to convert reactive astrocytes to dopaminergic neurons in a 6-hydroxydopamine mouse model of Parkinson’s disease
Source: eLife journal article supplement (doi:10.7554/elife.75636), 2022-05-09
Supplement: fig3-data3 [file original data and statistical analysis of Fig3 D E.xlsx]

## Sheet: Sheet1
	Quantification of NeuN+ neurons and TH+ dopaminergic neurons in the substantia nigra 3 month after AAV-shPTB or AAV-shscramble delivery in the substantia of 6-OHDA lesioned mice
			slice1		slice2		slice3		slice4		slice5		Total
		mice	TH+	NeuN+	TH+	NeuN+	TH+	NeuN+	TH+	NeuN+	TH+	NeuN+	TH+	NeuN+
	AAV-shscramble	#10	6	195	11	224	5	152	32	182	29	203	83	956
		#24	6	320	6	162	4	159	14	201	13	247	43	1089
		#26	7	203	16	169	12	166	7	213	17	206	59	957
		#28	4	184	3	193	8	168	4	154	5	193	24	892
		#81	4	83	4	92	7	171	20	202	23	189	58	737
	AAV-shPTB	#13	11	209	3	93	10	254	12	180	0	109	36	845
		#19	17	269	2	136	8	195	15	221	0	146	42	967
		#21	10	214	15	284	6	149	9	203	2	146	42	996
		#24	7	162	6	171	13	201	14	219	24	128	64	881
		#66	7	259	5	130	4	185	16	166	15	259	47	999
		#74	11	239	4	155	11	183	7	228	26	226	59	1031
		#76	6	285	2	166	12	135	13	178	25	209	58	973
		#84	3	275	3	109	6	199	3	249	20	217	35	1049
	NeuN+ cell counts							TH+ cell counts
	AAV-shscramble	AAV-shPtbp1						AAV-shscramble	AAV-shPTB
	956	845						83	36
	1089	967						43	42
	957	996						59	42
	892	881						24	64
	737	999						58	47
		1031							59
		973							58
		1049							35
	Unpaired t test							Unpaired t test
	Table Analyzed	Unpaired t test data						Table Analyzed	Unpaired t test data
	Column B	AAV-shPtbp1						Column B	AAV-shPTB
	vs.	vs.						vs.	vs.
	Column A	AAV-shscramble						Column A	AAV-shscramble
	Unpaired t test							Unpaired t test
	P value	0.4627						P value	0.5534
	P value summary	ns						P value summary	ns
	Significantly different (P < 0.05)?	No						Significantly different (P < 0.05)?	No
	One- or two-tailed P value?	Two-tailed						One- or two-tailed P value?	Two-tailed
	t, df	t=0.7610, df=11						t, df	t=0.6114, df=11
	How big is the difference?							How big is the difference?
	Mean of column A	926.2						Mean of column A	53.4
	Mean of column B	967.6						Mean of column B	47.88
	Difference between means (B - A) ± SEM	41.43 ± 54.44						Difference between means (B - A) ± SEM	-5.525 ± 9.037
	95% confidence interval	-78.39 to 161.2						95% confidence interval	-25.42 to 14.37
	R squared (eta squared)	0.05001						R squared (eta squared)	0.03286
	F test to compare variances							F test to compare variances
	F, DFn, Dfd	3.266, 4, 7						F, DFn, Dfd	3.856, 4, 7
	P value	0.1645						P value	0.1158
	P value summary	ns						P value summary	ns
	Significantly different (P < 0.05)?	No						Significantly different (P < 0.05)?	No
	Data analyzed							Data analyzed
	Sample size, column A	5						Sample size, column A	5
	Sample size, column B	8						Sample size, column B	8
