# Supplementary material for: Repressing PTBP1 fails to convert reactive astrocytes to dopaminergic neurons in a 6-hydroxydopamine mouse model of Parkinson’s disease
Source: eLife journal article supplement (doi:10.7554/elife.75636), 2022-05-09
Supplement: fig4-data2 [file description of source data for Fig4D.docx]

Brain slices of 6-OHDA lesioned *Aldh1l1-CreERT2*:*Rpl22HA/HA* mice after ASO-*Ptbp1* delivery in substantia nigra, co-stained with HA (green) and NeuN (red) or TH (purple).
