# Supplementary material for: Repressing PTBP1 fails to convert reactive astrocytes to dopaminergic neurons in a 6-hydroxydopamine mouse model of Parkinson’s disease
Source: eLife journal article supplement (doi:10.7554/elife.75636), 2022-05-09
Supplement: fig4-data3 [file original data and statistical analysis of Fig4 E.xlsx]

## Sheet: Sheet1
	Apomorphine-induced rotation before and 2M after ASO-Ptbp1 or ASO-Ctrl to astrocyte tracing mice in 6-OHDA model
		0 month		2 month
	ASO-Ptbp1	Contralateral rotation（Net）	Net Contralateral rotation per min（total 20min）	Contralateral rotation（Net）	Net Contralateral rotation per min（total 20min）
	#85	91	4.55	96	4.8
	#90	96	4.8	111	5.55
	#97	148	7.4	177	8.85
		ASO-Ptbp1
		0 M	2 M
	#85	4.55	4.8
	#90	4.8	5.55
	#97	7.4	8.85
	Paired t test
	Paired t test
	P value	0.1435
	P value summary	ns
	Significantly different (P < 0.05)?	No
	One- or two-tailed P value?	Two-tailed
	t, df	t=2.347, df=2
	Number of pairs	3
	How big is the difference?
	Mean of differences (B - A)	0.8167
	SD of differences	0.6028
	SEM of differences	0.348
	95% confidence interval	-0.6807 to 2.314
	R squared (partial eta squared)	0.7336
	How effective was the pairing?
	Correlation coefficient (r)	0.9954
	P value (one tailed)	0.0304
	P value summary	*
	Was the pairing significantly effective?	Yes
