# Supplementary material for: Repressing PTBP1 fails to convert reactive astrocytes to dopaminergic neurons in a 6-hydroxydopamine mouse model of Parkinson’s disease
Source: eLife journal article supplement (doi:10.7554/elife.75636), 2022-05-09
Supplement: fig4-figsupp1-data1 [file description of source data for Fig4 supplement 1.docx]

Brain slices of *Aldh1l1-CreERT2*:*Rosa-YFP* mice co-stained with PTBP1 (purple), YFP (green) and Cy3 (red) after ASO-*Ptbp1* or ASO-Ctrl delivery in the substantia nigra.
