# Supplementary material for: Repressing PTBP1 fails to convert reactive astrocytes to dopaminergic neurons in a 6-hydroxydopamine mouse model of Parkinson’s disease
Source: eLife journal article supplement (doi:10.7554/elife.75636), 2022-05-09
Supplement: fig4-figsupp1-data1 [file original data and statistical analysis of FigS4 supplement 1.xlsx]

## Sheet: Sheet1
Fig 4 supplement 1 A,B			Area	Mean	Min	Max	IntDen	mean value of ASO-CTRL	RawIntDen	relative density (to the mean value of ASO-Ctrl 1.98067 )
	ASO-ctrl #23	1	2.697	0.764	0.477	0.959	2.06	1.98067	1153986	1.04005
	ASO-ctrl #24	2	2.803	0.779	0.002	0.959	2.185		1152714	1.10316
	ASO-ctrl #66	3	2.165	0.784	0.477	0.959	1.697		875186	0.856781
	ASO-PTB #68	4	1.032	0.831	0.477	0.959	0.858		371558	0.433187
	ASO-PTB #69	5	0.99	0.798	0.477	0.959	0.79		392569	0.398855
	ASO-PTB #70	6	0.693	0.819	0.477	0.959	0.567		258176	0.286267
	ASO-PTB #71	7	0.846	0.825	0.477	0.959	0.698		309266	0.352406
	ASO-PTB #72	8	0.6	0.832	0.477	0.959	0.499		215018	0.251935
	relative density
	ASO-ctrl	ASO-Ptbp1
	1.04005	0.433187
	1.10316	0.398855
	0.856781	0.286267
		0.352406
		0.251935
	Unpaired t test
	Table Analyzed	Data 1
	Column B	ASO-Ptbp1
	vs.	vs.
	Column A	ASO-ctrl
	Unpaired t test
	P value	<0.0001
	P value summary	****
	Significantly different (P < 0.05)?	Yes
	One- or two-tailed P value?	Two-tailed
	t, df	t=9.324, df=6
	How big is the difference?
	Mean of column A	1
	Mean of column B	0.3445
	Difference between means (B - A) ± SEM	-0.6555 ± 0.07030
	95% confidence interval	-0.8275 to -0.4834
	R squared (eta squared)	0.9354
	F test to compare variances
	F, DFn, Dfd	2.868, 2, 4
	P value	0.3375
	P value summary	ns
	Significantly different (P < 0.05)?	No
	Data analyzed
	Sample size, column A	3
	Sample size, column B	5
				Area	Mean	Min	Max	IntDen	RawIntDen
	PTBP1(Thermo)	ASO-ctrl	1	2494	33.817	0	120	84340	84340
			2	2494	30.007	0	129	74837	74837
			3	2494	27.996	0	116	69823	69823
		ASO-PTB	4	2494	21.083	0	113	52582	52582
			5	2494	17.386	0	108	43361	43361
			6	2494	9.644	0	48	24052	24052
	β-actin	ASO-ctrl	7	2494	43.267	0	102	107908	107908
			8	2494	44.317	0	109	110526	110526
			9	2494	36.794	0	104	91764	91764
		ASO-PTB	10	2494	41.356	0	118	103142	103142
			11	2494	40.123	0	111	100068	100068
			12	2494	40.043	0	110	99866	99866
		ASO-ctrl			ASO-PTB
		1	2	3	1	2	3
	β-actin	107908	110526	91764	103142	100068	99866
	PTBP1	84340	74837	69823	52582	43361	24052
	PTBP1/β-actin	0.781592	0.677099	0.760898	0.509802	0.433315	0.240843
	mean value of ASO-CTRL	0.739863
	relative PTBP1/β-actin ratio (to the mean value of ASO-Ctrl 0.739862616)	1.0564	0.915168	1.02843	0.68905	0.58567	0.325524
	relative PTBP1/β-actin ratio
	ASO-ctrl	ASO-PTB
	1.05683	0.689049
	0.915539	0.585669
	1.02885	0.325524
	Unpaired t test
	Table Analyzed	Data 1
	Column B	ASO-Ptbp1
	vs.	vs.
	Column A	ASO-ctrl
	Unpaired t test
	P value	0.016
	P value summary	*
	Significantly different (P < 0.05)?	Yes
	One- or two-tailed P value?	Two-tailed
	t, df	t=4.010, df=4
	How big is the difference?
	Mean of column A	1
	Mean of column B	0.5334
	Difference between means (B - A) ± SEM	-0.4670 ± 0.1165
	95% confidence interval	-0.7903 to -0.1437
	R squared (eta squared)	0.8008
	F test to compare variances
	F, DFn, Dfd	6.268, 2, 2
	P value	0.2752
	P value summary	ns
	Significantly different (P < 0.05)?	No
	Data analyzed
