# Supplementary material for: Repressing PTBP1 fails to convert reactive astrocytes to dopaminergic neurons in a 6-hydroxydopamine mouse model of Parkinson’s disease
Source: eLife journal article supplement (doi:10.7554/elife.75636), 2022-05-09
Supplement: fig4-figsupp2-data1 [file original data of Fig4 supplement 2.xlsx]

## Sheet: Sheet1
	Apomorphine-induced rotation before and 2M after ASO-Ptbp1 or ASO-Ctrl to astrocyte tracing mice in 6-OHDA model
		0 month		2 month
	ASO-Ptbp1	Contralateral rotation（Net）	Net Contralateral rotation per min（total 20min）	Contralateral rotation（Net）	Net Contralateral rotation per min（total 20min）
	#54	93	4.65	95	4.75
